# Supplementary material for: High-frequency NO 3 − isotope (δ 15 N, δ 18 O) patterns in groundwater recharge reveal that short-term land use and climatic changes influence nitrate contamination trends
Source: Copernicus journal article supplement (doi:10.5194/hess-2018-35), 2018-02-07
Supplement: Supplementary file 1 [file hess-2018-35-supplement.zip]

**Supplementary Table:** Abbotsford-Sumas analytical results: date (dd/mm/yyyy), well ID, water table elevation (meters above sea level), chloride concentration (mg L<sup>-1</sup>), nitrate concentrations (mg N L<sup>-1</sup>) and isotopic composition of nitrate ( $\delta^{15}\text{N}$  and  $\delta^{18}\text{O}$ ).
